# Supplementary material
Source: publisher figshare collection journal article supplement (https://acs.figshare.com/ndownloader/files/6125466)
Supplement: Supplementary file 1 [file 6125466]

*Supporting information*

**Surface Physical Activity and Hydrophobicity of Designed Helical Peptide Amphiphiles Control Their Bioactivity and Cell Selectivity**

Cuixia Chen,<sup>†</sup> Cheng Yang,<sup>†</sup> Yucan Chen,<sup>†</sup> Fang Wang,<sup>†</sup> Quanmeng Mu,<sup>†</sup> Jing Zhang,<sup>‡</sup>  
Zongyi Li,<sup>‡</sup> Fang Pan,<sup>‡</sup> Hai Xu,<sup>†,\*</sup> and Jian Ren Lu<sup>‡,\*</sup>

<sup>†</sup>State Key Laboratory of Heavy Oil Processing and Centre for Bioengineering and Biotechnology,  
China University of Petroleum (East China), 66 Changjiang West Road, Qingdao 266580, China

<sup>‡</sup>Biological Physics Laboratory, School of Physics and Astronomy, University of Manchester,  
Schuster Building, Manchester M13 9PL, UK

\*Correspondence should be made to: Hai Xu, Tel: (+86)532-8698-1569, E-mail: xuh@upc.edu.cn and  
Jian R. Lu, Tel: (+44)-161-200-3926, E-mail: j.lu@manchester.ac.uk

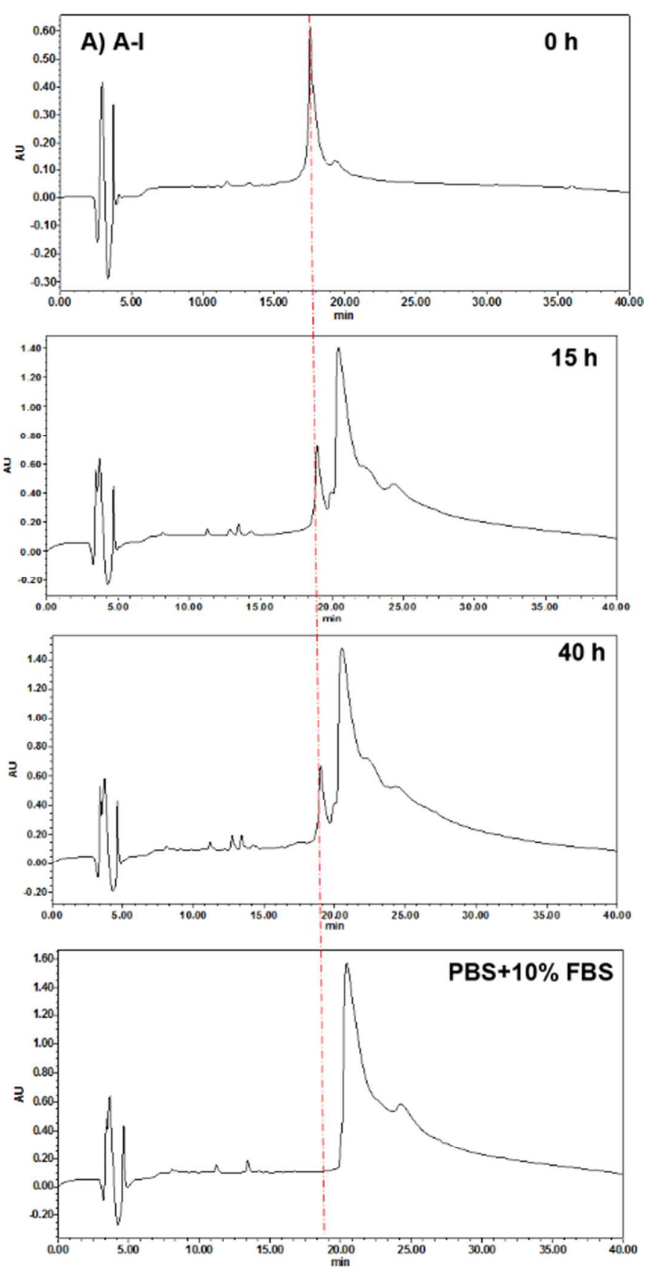

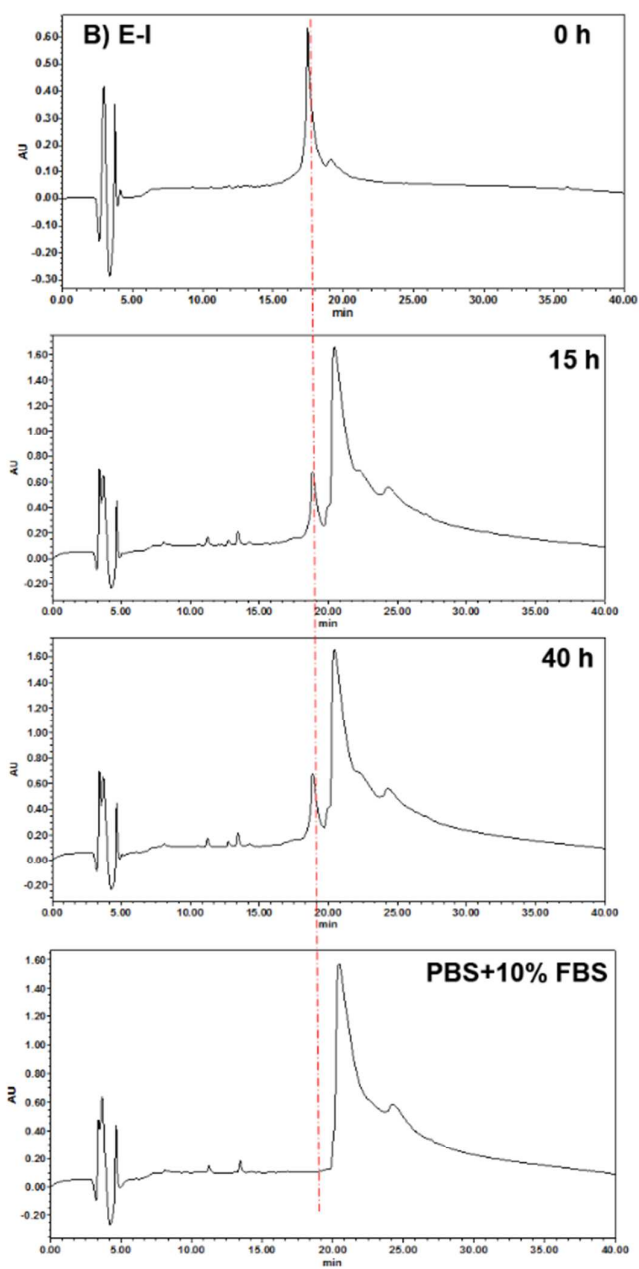

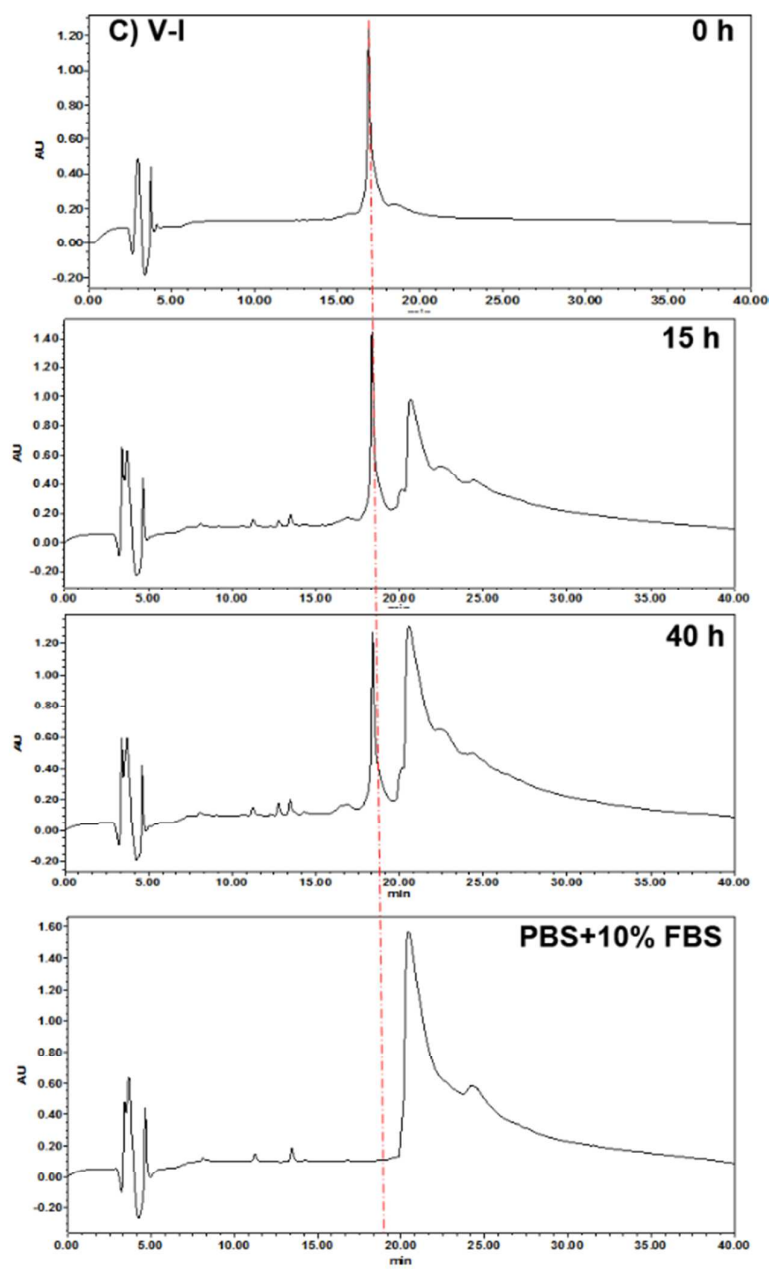

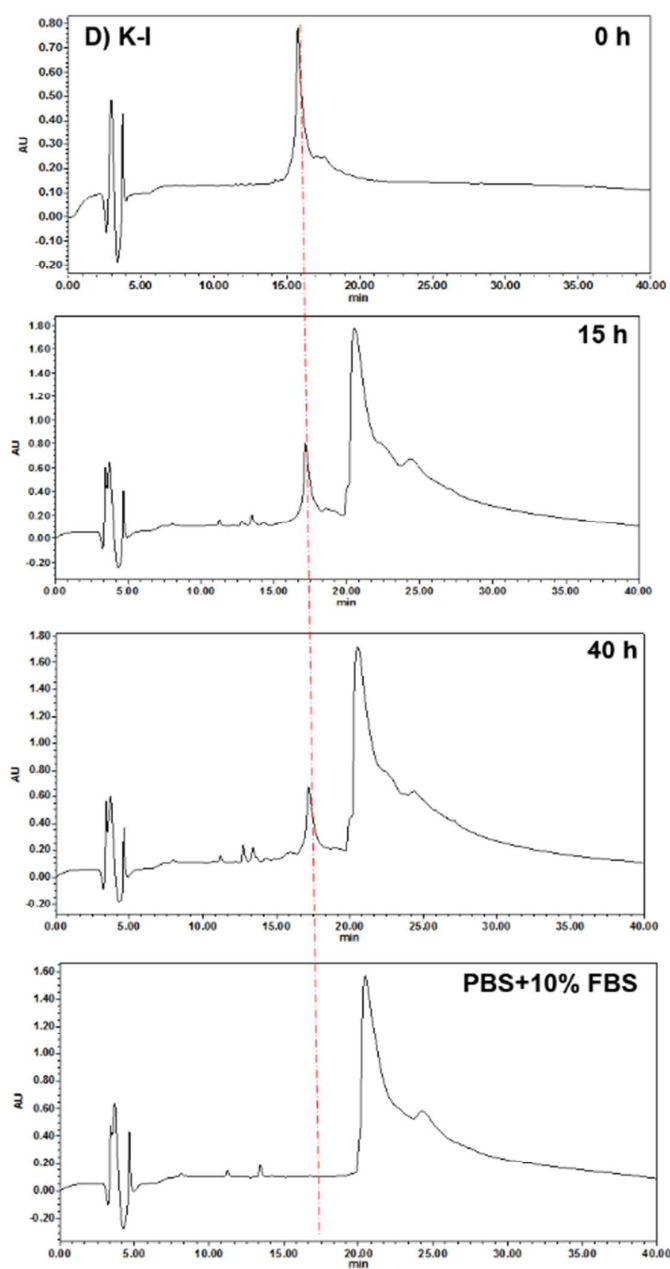

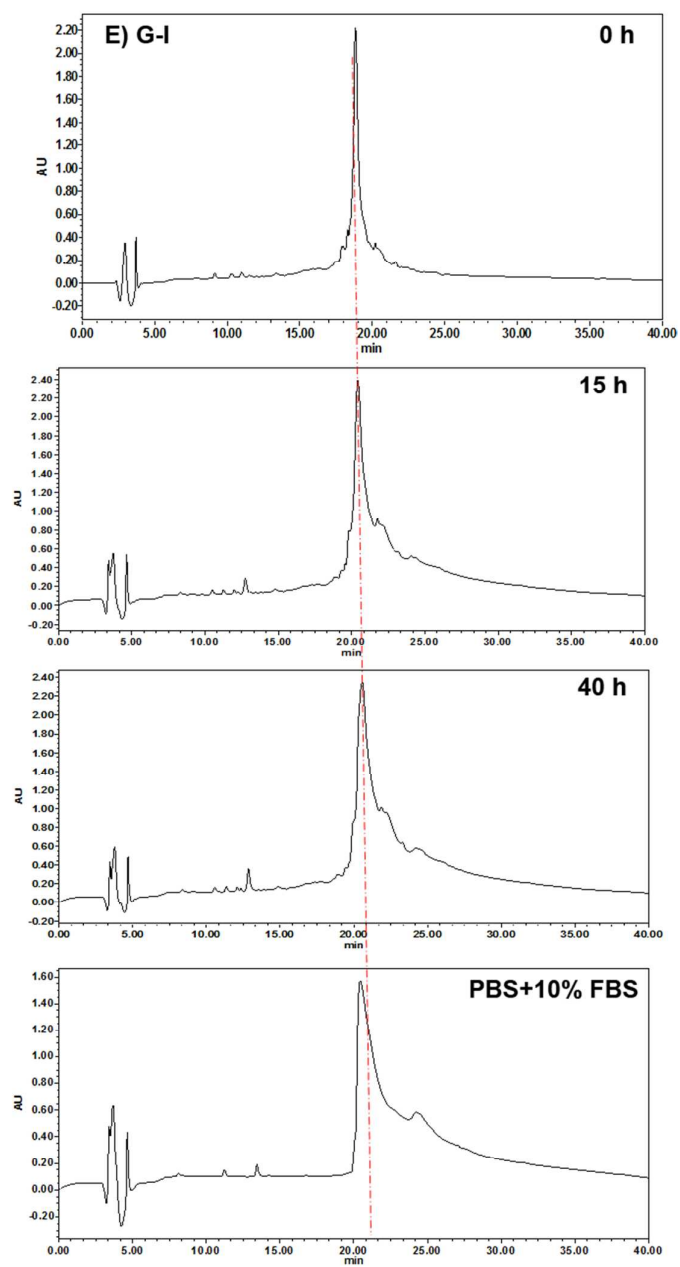

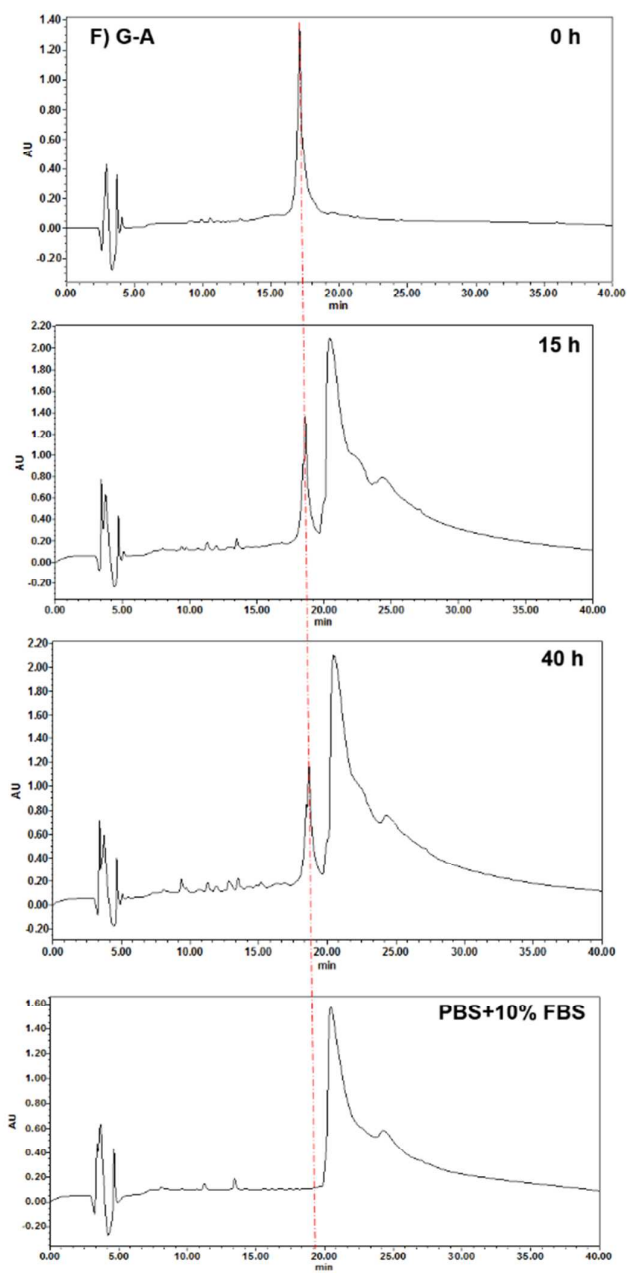

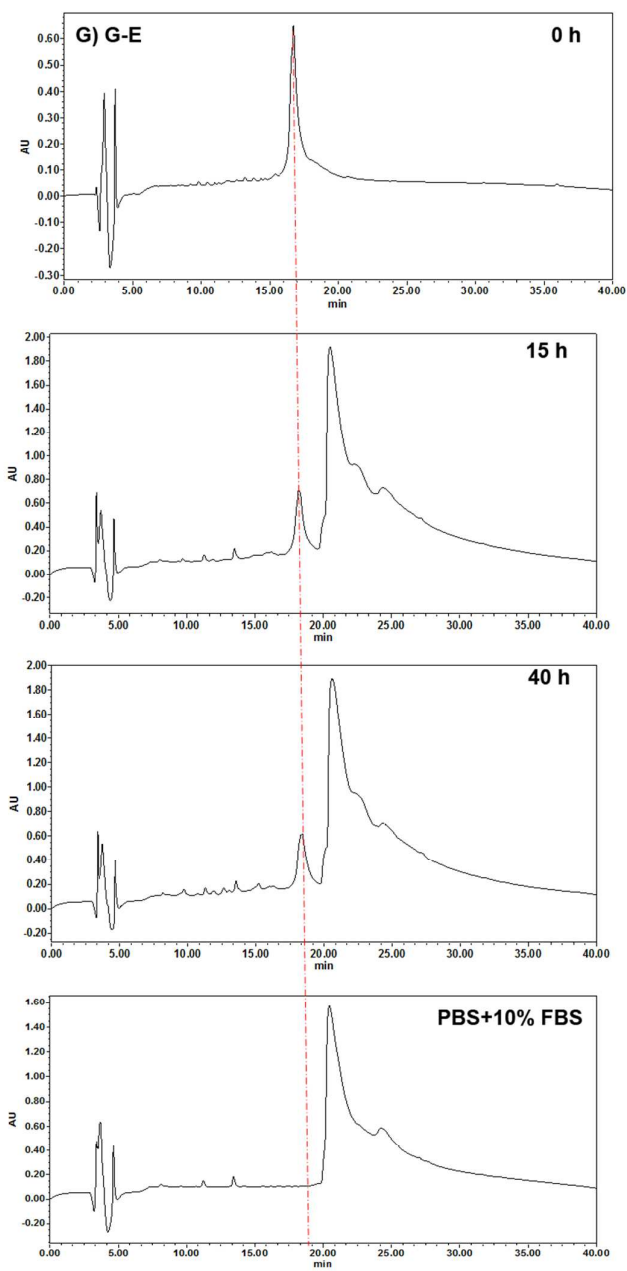



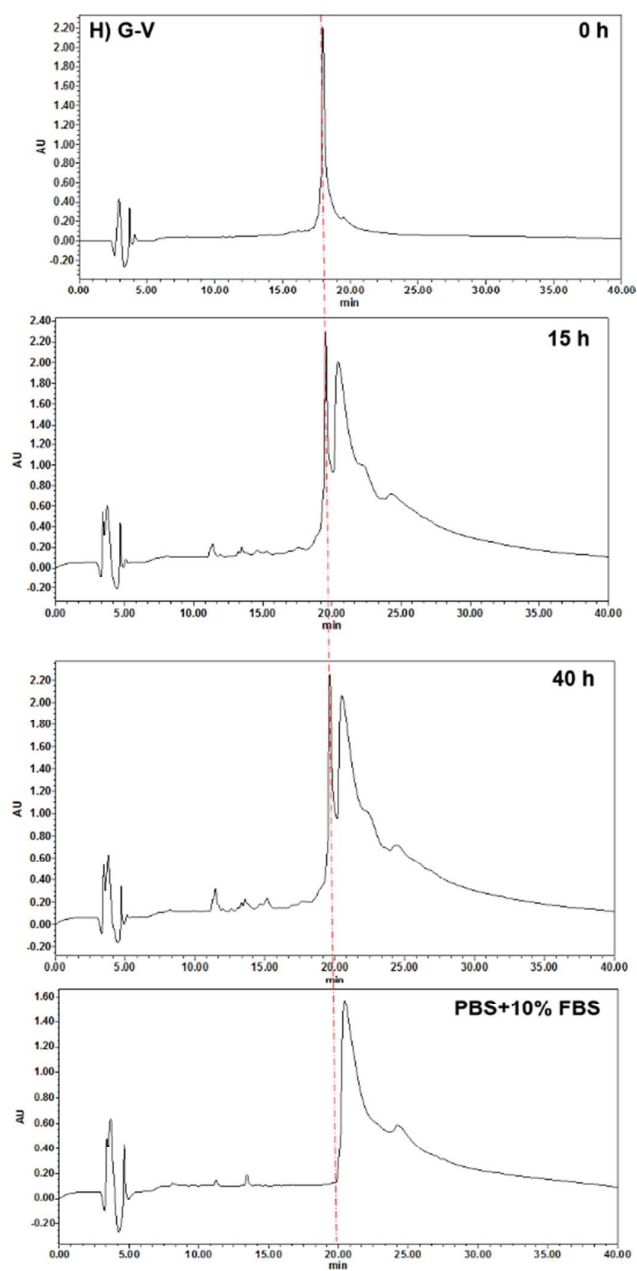

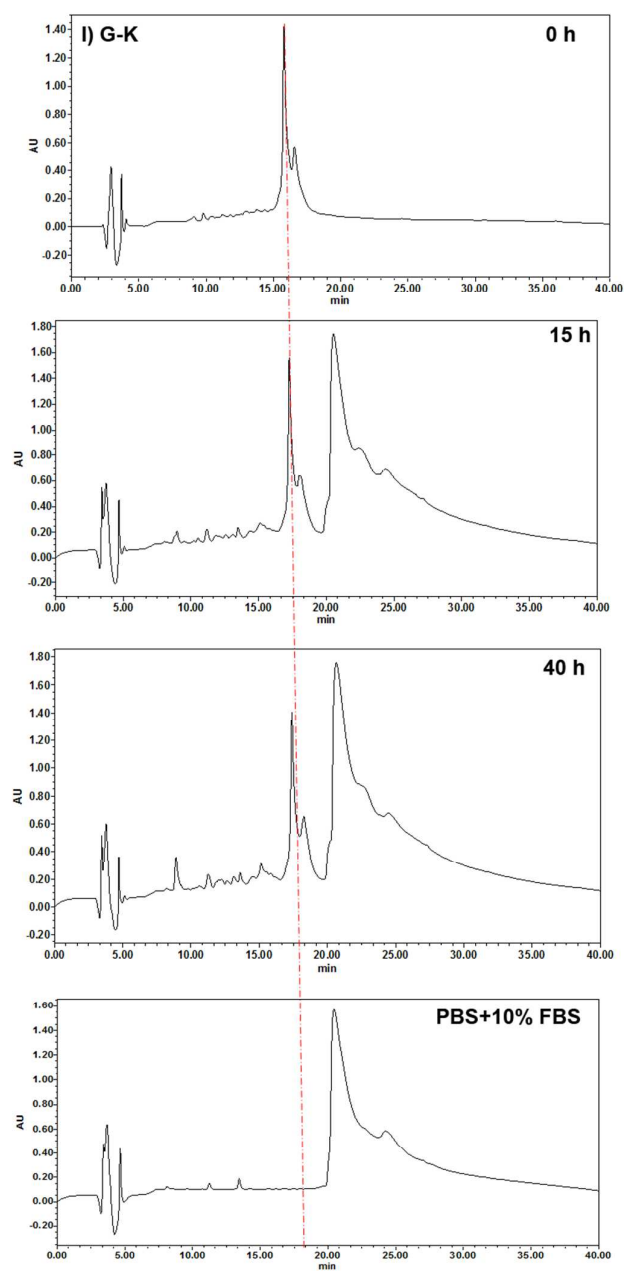

**Figure S1.** HPLC spectra of A) A-I, B) E-I, C) V-I, D) K-I, E) G-I, F) G-A, G) G-E, H) G-V, and I) G-K peptides in the absence of 10% fetal bovine serum (FBS) (0 h) and in the presence of 10% FBS (incubation for 15 h and 40 h). The spectrum of 10% FBS in PBS served as control. HPLC conditions: The peptide concentration was fixed at 1 mg mL<sup>-1</sup>. HPLC profiles were recorded on a Waters 2695 Alliance system equipped with

a C18 reversed-phase column (4.6 mm × 150 mm) at room temperature. After being loaded, the samples were eluted *via* a gradient mode as follows: 0–5 min, an isocratic elution of 95% eluent A (0.1% trifluoroacetic acid (TFA) in water) and 5% eluent B (0.1% TFA in acetonitrile); 5–40 min, a linear gradient elution to 5% eluent A and 95% eluent B; 40–45 min, a linear gradient elution back to 95% eluent A and 5% eluent B. The flow rate was 0.6 mL min<sup>-1</sup> and the UV detector was set at 214 nm.

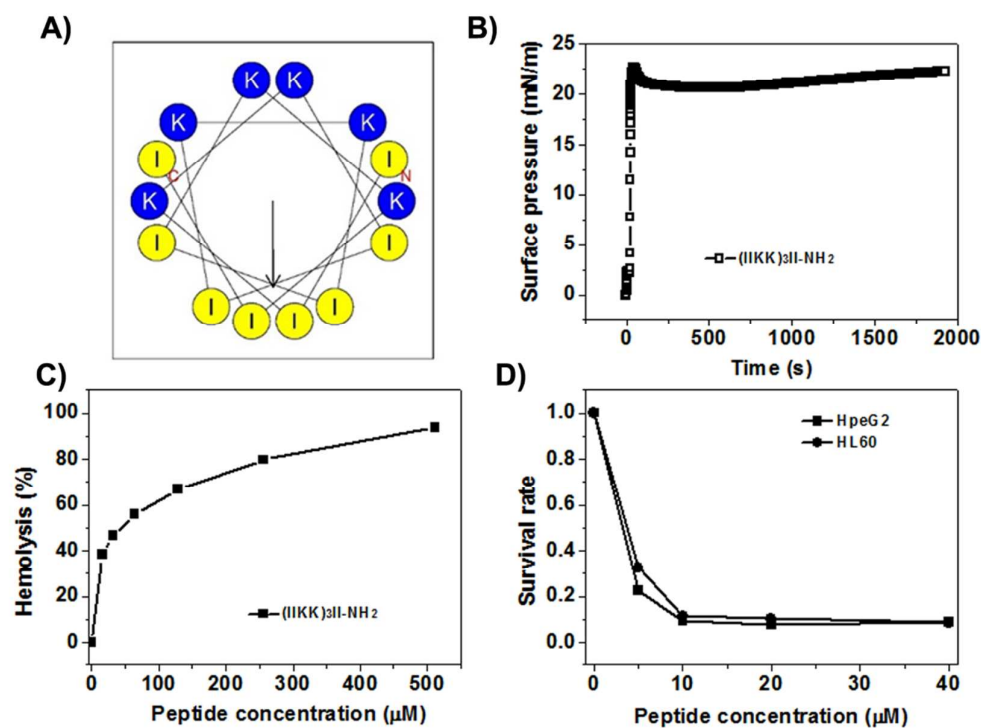

**Figure S2.** A) Helical wheel of (IIKK)<sub>3</sub>II-NH<sub>2</sub>. B) Surface pressure achieved after (IIKK)<sub>3</sub>II-NH<sub>2</sub> adsorption at the air/water interface; the sub-phase was Tris-HCl with 150 mM NaCl (pH 7.4), and the peptide concentration was fixed at 3 μM. C) Hemolytic activity of (IIKK)<sub>3</sub>II-NH<sub>2</sub> determined by monitoring the hemoglobin release from human fresh blood cells after adding the peptide. D) Anticancer activity of (IIKK)<sub>3</sub>II-NH<sub>2</sub> against HpeG2 and HL60 cells measured by MTT assays.
